# Supplementary material for: New insight into the spatiotemporal distribution and ecological risk assessment of endocrine-disrupting chemicals in the Minjiang and Tuojiang rivers: perspective of watershed landscape patterns
Source: Royal Society of Chemistry journal article supplement (doi:10.1039/d4em00052h), 2024-01-01
Supplement: d4em00052h1.pdf [file d4em00052h1.pdf]

## Supporting materials

New insight into the spatiotemporal distribution and ecological risk assessment of endocrine-disrupting chemicals of Minjiang and Tuojiang rivers: Perspective of watershed landscape pattern

Weike Zhao <sup>a</sup>, Peilin Li <sup>b</sup>, Bo Yang <sup>b,\*</sup>

<sup>a</sup> *School of Architecture and Civil Engineering, Xihua University, Chengdu 610039, China*

<sup>b</sup> *China MCC5 Group Corp. Ltd, Chengdu 610023, China*

\* Corresponding author.

E-mail addresses: [yangboscu@126.com](mailto:yangboscu@126.com)

**Number of pages (including this page): 14**

**Number of tables: 7**

**Number of figures: 3**

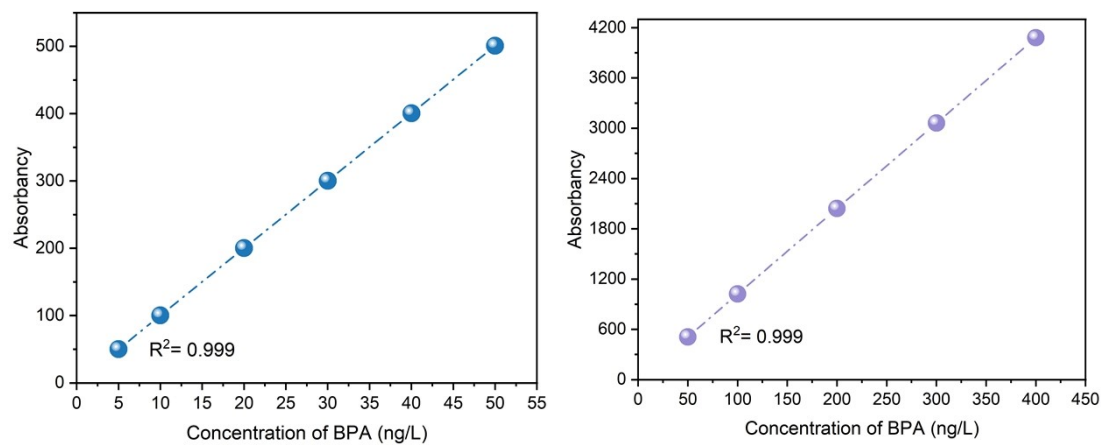

Fig.S1. Standard curve of 0 -50 ng/L (a), 50 - 500 ng/L (b) BPA.

Table S1. The Minimum Quantification Limit (MQL) of EDCs.

| Type of EDCs | MQL  |
|--------------|------|
| E1           | 0.1  |
| E2           | 0.1  |
| E3           | 0.1  |
| EE2          | 0.1  |
| DES          | 0.1  |
| BPA          | 1    |
| NP           | 0.1  |
| OP           | 0.01 |

Note:1. The unit of MQL is ng/L.

Table S2. the recovery and matrixes effects of EDCs.

| Type of EDCs | Recovery | Matrix effects |
|--------------|----------|----------------|
| E1           | 89%      | 102%           |
| E2           | 93%      | 99%            |
| E3           | 95%      | 97%            |
| EE2          | 88%      | 92%            |
| DES          | 105%     | 108%           |
| BPA          | 110%     | 101%           |
| NP           | 100%     | 95%            |
| OP           | 107%     | 104%           |

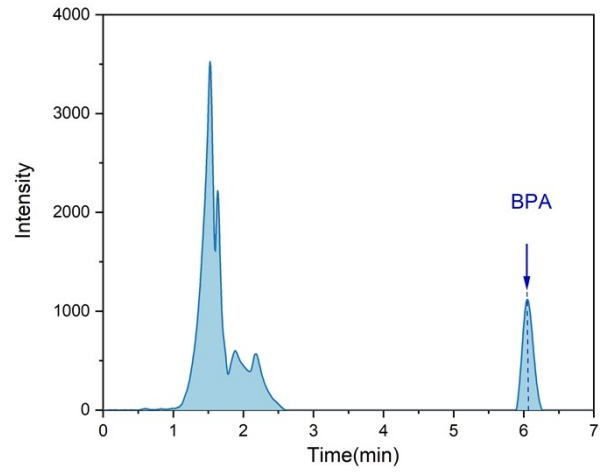

Fig.S2. Chromatogram of BPA ( $C_{\text{BPA}} = 20 \text{ ng/L}$ ).

**Table S3.** Molecular structures and properties of the eight estrogens.

| Estrogens name                      | Molecular formula | Molecular weight | $\log K_{ow}$ | Structure                                                                            |
|-------------------------------------|-------------------|------------------|---------------|--------------------------------------------------------------------------------------|
| Estrone (E1)                        | $C_{18}H_{22}O_2$ | 270.37           | 3.43          | 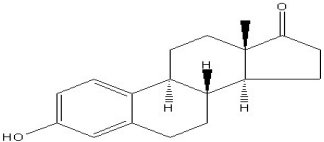   |
| 17 $\beta$ -Estradiol (E2)          | $C_{18}H_{24}O_2$ | 272.38           | 4.01          |    |
| Estriol (E3)                        | $C_{18}H_{24}O_3$ | 288.38           | 2.6           |    |
| 17 $\alpha$ -Ethinylestradiol (EE2) | $C_{20}H_{24}O_2$ | 296.41           | 4.15          |   |
| Diethylstilbestrol (DES)            | $C_{18}H_{20}O_2$ | 268.36           | 5.07          |  |
| Nonyl Phenol (NP)                   | $C_{15}H_{24}O$   | 220.24           | 5.71          |  |
| Octyl phenol (OP)                   | $C_{14}H_{22}O$   | 206.32           | 4.12          |  |
| Bisphenol A (BPA)                   | $C_{15}H_{16}O_2$ | 228.29           | 3.64          |  |

**Table S4.** The mass spectrum parameters of EDCs in MRM mode.

| EDCs | Q <sub>1</sub> (m/z) | Q <sub>3</sub> (m/z) | DP <sup>a</sup> (V) | EP <sup>b</sup> (V) |
|------|----------------------|----------------------|---------------------|---------------------|
| E1   | 270.4                | 159.2                | -70                 | -50                 |
|      |                      | 183.3                |                     |                     |
| E2   | 272.4                | 145.1                | -70                 | -57                 |
|      |                      | 183.0                |                     |                     |
| E3   | 288                  | 145.0                | -70                 | -57                 |
|      |                      | 171.1                |                     |                     |
| EE2  | 365.5                | 144.9                | -65                 | -55                 |
|      |                      | 158.8                |                     |                     |
| DES  | 268.4                | 222.2                | -55                 | -47                 |
|      |                      | 237.1                |                     |                     |
| BPA  | 228                  | 133.0                | -50                 | -38                 |
|      |                      | 212.2                |                     |                     |
| NP   | 220.2                | 133.0                | -45                 | -44                 |
|      |                      | 147.0                |                     |                     |
| OP   | 206                  | 106.1                | -42                 | -43                 |
|      |                      | 133.0                |                     |                     |

a=Declustering Potential

b=Entrance Potential

**Table S5. 8** Landscape indicators used in the study.

| Pointer type | English full name         | Calculation formula                   | Definition of Indicator                                                                                                                                                                                     |
|--------------|---------------------------|---------------------------------------|-------------------------------------------------------------------------------------------------------------------------------------------------------------------------------------------------------------|
| CA           | Class area                | $CA = \sum_{i=1}^n A_i$               | By calculating the total category area, one can understand the proportion of each category in the entire landscape.                                                                                         |
| NuP          | Number of patches         | $NuP = n_i$                           | $NuP \geq 1$ , NuP indicates the total number of patches that are equal to a specific type of patch.                                                                                                        |
| PLAND        | Percent of landscape      | $PLAND = \sum_{i=1}^n a_i \times 1$   | $0 < PLAND \leq 100$ , PLAND represents the percentage of the total landscape area occupied by a specific patch type. A higher PLAND value indicates a richer coverage of this patch type in the landscape. |
| Ci           | Fragmentation index       | $Ci = \frac{NP_i}{CA_i}$              | $0 \leq Ci \leq 1$ , where a lower value of the fragmentation index indicates better connectivity among patches in the landscape and a more intact landscape structure.                                     |
| LSI          | Landscape shape index     | $LSI = \frac{0.25E_i}{\sqrt{CA_i}}$   | $0 \leq LSI \leq 1$ , When LSI approaches 1, it indicates that the patches in the landscape tend to have irregular shapes, complex boundaries, and a more intricate geometry.                               |
| Si           | Significance index        | $Si = CA_i/A$                         | $0 \leq Si \leq 1$ , Si is higher when the corresponding patch has greater importance or value in the landscape.                                                                                            |
| SHDI         | Shannon's diversity index | $SHDI = - \sum_{i=1}^n (P_i \ln P_i)$ | $SHDI \geq 0$ , SHDI is a measurement index based on information theory that reflects the diversity of the landscape.                                                                                       |
| SHEI         | Shannon's evenness index  | $SHEI = (H/H_{max})$                  | $0 \leq SHEI \leq 1$ , SHEI reflects the evenness and dominance of the landscape composition, and is an important aspect of diversity indices.                                                              |



**Table S6.** Land landscape pattern index around Minjiang River.

| Sampling location | land use type           | CA       | Number | PLAND | $C_i$  | LSI   | $S_i$ | SHDI | SHEI |
|-------------------|-------------------------|----------|--------|-------|--------|-------|-------|------|------|
| M1                | Cultivated land         | 3344.67  | 72     | 10.65 | 2.27   | 12.79 | 0.11  | 1.01 | 0.63 |
|                   | Forest                  | 14882.04 | 33     | 47.37 | 7.20   | 12.26 | 0.47  |      |      |
|                   | Grassland               | 12884.85 | 44     | 41.01 | 3.28   | 12.29 | 0.41  |      |      |
|                   | Water area              | 261.27   | 7      | 0.83  | 14.29  | 13.01 | 0.01  |      |      |
|                   | Unused land             | 42.48    | 1      | 0.14  | 0.00   | 1.77  | 0.00  |      |      |
|                   | Urban land              | 0        | 0      | 0.00  | 0.00   | 0.00  | 0.00  |      |      |
|                   | Rural residential land  | 0        | 0      | 0.00  | 0.00   | 0.00  | 0.00  |      |      |
|                   | Other construction land | 0        | 0      | 0.00  | 0.00   | 0.00  | 0.00  |      |      |
| M2                | Cultivated land         | 2328.66  | 31     | 7.41  | 3.23   | 9.89  | 0.07  | 0.92 | 0.51 |
|                   | Forest                  | 12003.48 | 74     | 38.21 | 3.52   | 15.62 | 0.38  |      |      |
|                   | Grassland               | 16962.93 | 20     | 53.99 | 11.58  | 14.81 | 0.54  |      |      |
|                   | Water area              | 0        | 0      | 0.00  | 0.00   | 0.00  | 0.00  |      |      |
|                   | Unused land             | 0        | 0      | 0.00  | 0.00   | 0.00  | 0.00  |      |      |
|                   | Urban land              | 50.04    | 1      | 0.16  | 0.00   | 2.52  | 0.00  |      |      |
|                   | Rural residential land  | 22.95    | 3      | 0.07  | 0.00   | 2.28  | 0.00  |      |      |
|                   | Other construction land | 48.06    | 6      | 0.16  | 20.00  | 3.55  | 0.00  |      |      |
| M3                | Cultivated land         | 1213.2   | 46     | 3.86  | 3.38   | 9.45  | 0.04  | 0.91 | 0.44 |
|                   | Forest                  | 17320.23 | 27     | 55.13 | 6.27   | 8.37  | 0.55  |      |      |
|                   | Grassland               | 12402.36 | 31     | 39.48 | 6.67   | 12.16 | 0.39  |      |      |
|                   | Water area              | 208.17   | 5      | 0.66  | 50.00  | 15.60 | 0.01  |      |      |
|                   | Unused land             | 11.16    | 1      | 0.04  | 0.00   | 1.39  | 0.00  |      |      |
|                   | Urban land              | 84.51    | 2      | 0.27  | 100.00 | 3.13  | 0.00  |      |      |
|                   | Rural residential land  | 45.45    | 9      | 0.14  | 16.67  | 3.58  | 0.00  |      |      |
|                   | Other construction land | 131.31   | 7      | 0.42  | 4.76   | 4.43  | 0.00  |      |      |
| M4                | Cultivated land         | 10420.83 | 56     | 33.17 | 3.83   | 13.86 | 0.33  | 1.33 | 0.64 |

|    |                         |          |     |           |            |       |      |     |     |
|----|-------------------------|----------|-----|-----------|------------|-------|------|-----|-----|
|    | Forest                  | 14052.96 | 20  | 44.7<br>3 | 10.53      | 8.32  | 0.45 |     |     |
|    | Grassland               | 87.84    | 9   | 0.28      | 2.78       | 3.92  | 0.00 |     |     |
|    | Water area              | 1349.1   | 1   | 4.29      | 0.00       | 5.44  | 0.04 |     |     |
|    | Unused land             | 104.58   | 9   | 0.33      | 5.56       | 4.49  | 0.00 |     |     |
|    | Urban land              | 3918.33  | 2   | 12.4<br>7 | 100.0<br>0 | 5.68  | 0.12 |     |     |
|    | Rural residential land  | 1124.91  | 51  | 3.58      | 2.67       | 12.47 | 0.04 |     |     |
|    | Other construction land | 356.58   | 24  | 1.14      | 3.26       | 7.36  | 0.01 |     |     |
|    | Cultivated land         | 25962.57 | 10  | 82.6<br>4 | 20.00      | 16.04 | 0.83 |     |     |
|    | Forest                  | 364.86   | 55  | 1.16      | 3.84       | 13.16 | 0.01 |     |     |
|    | Grassland               | 0        | 0   | 0.00      | 0.00       | 0.00  | 0.00 |     |     |
|    | Water area              | 857.43   | 8   | 2.73      | 3.57       | 3.83  | 0.03 | 0.6 | 0.3 |
| M5 | Unused land             | 0        | 0   | 0.00      | 0.00       | 0.00  | 0.00 | 3   | 5   |
|    | Urban land              | 51.48    | 1   | 0.16      | 0.00       | 3.13  | 0.00 |     |     |
|    | Rural residential land  | 3768.48  | 618 | 12.0<br>0 | 0.93       | 33.64 | 0.12 |     |     |
|    | Other construction land | 410.04   | 12  | 1.31      | 1.52       | 5.36  | 0.01 |     |     |
|    | Cultivated land         | 24570.45 | 13  | 78.2<br>1 | 24.36      | 11.99 | 0.78 |     |     |
|    | Forest                  | 2852.91  | 38  | 9.08      | 7.97       | 12.43 | 0.09 |     |     |
|    | Grassland               | 29.16    | 3   | 0.09      | 0.00       | 2.11  | 0.00 |     |     |
|    | Water area              | 28.44    | 5   | 0.09      | 30.00      | 4.22  | 0.00 | 0.7 | 0.4 |
| M6 | Unused land             | 0        | 0   | 0.00      | 0.00       | 0.00  | 0.00 | 8   | 0   |
|    | Urban land              | 1424.07  | 7   | 4.53      | 33.33      | 5.49  | 0.05 |     |     |
|    | Rural residential land  | 2341.08  | 247 | 7.45      | 1.75       | 21.77 | 0.07 |     |     |
|    | Other construction land | 169.92   | 18  | 0.54      | 3.27       | 5.94  | 0.01 |     |     |
|    | Cultivated land         | 21755.43 | 23  | 69.2<br>5 | 11.86      | 20.13 | 0.69 |     |     |
|    | Forest                  | 1352.52  | 107 | 4.31      | 2.72       | 18.65 | 0.04 |     |     |
|    | Grassland               | 27.63    | 2   | 0.09      | 100.0<br>0 | 2.00  | 0.00 |     |     |
| M7 | Water area              | 744.84   | 56  | 2.37      | 1.88       | 13.10 | 0.02 | 1.0 | 0.5 |
|    | Unused land             | 0        | 0   | 0.00      | 0.00       | 0.00  | 0.00 | 2   | 2   |
|    | Urban land              | 173.34   | 4   | 0.55      | 16.67      | 2.90  | 0.01 |     |     |
|    | Rural residential land  | 12191    | 410 | 12.1<br>9 | 0.83       | 30.85 | 0.12 |     |     |
|    | Other construction land | 3532.41  | 19  | 11.2      | 3.51       | 10.39 | 0.11 |     |     |

|     | land                    |          |     | 4     |       |       |      |     |     |
|-----|-------------------------|----------|-----|-------|-------|-------|------|-----|-----|
| M8  | Cultivated land         | 21607.2  | 50  | 68.78 | 6.61  | 17.26 | 0.69 |     |     |
|     | Forest                  | 4377.6   | 91  | 13.94 | 2.30  | 17.49 | 0.14 |     |     |
|     | Grassland               | 76.68    | 4   | 0.24  | 16.67 | 3.17  | 0.00 |     |     |
|     | Water area              | 1433.97  | 30  | 4.56  | 2.30  | 11.19 | 0.05 | 1.0 | 0.5 |
|     | Unused land             | 182.61   | 8   | 0.58  | 21.43 | 5.70  | 0.01 | 8   | 2   |
|     | Urban land              | 867.78   | 1   | 2.76  | 0.00  | 3.62  | 0.03 |     |     |
|     | Rural residential land  | 2314.89  | 195 | 7.37  | 1.50  | 21.03 | 0.07 |     |     |
|     | Other construction land | 553.23   | 18  | 1.76  | 2.61  | 5.12  | 0.02 |     |     |
| M9  | Cultivated land         | 23494.05 | 19  | 74.79 | 18.71 | 12.80 | 0.75 |     |     |
|     | Forest                  | 657.54   | 70  | 2.09  | 1.61  | 13.05 | 0.02 |     |     |
|     | Grassland               | 0        | 0   | 0.00  | 0.00  | 0.00  | 0.00 |     |     |
|     | Water area              | 1239.48  | 27  | 3.95  | 3.13  | 10.31 | 0.04 |     |     |
|     | Unused land             | 179.37   | 14  | 0.57  | 9.89  | 6.84  | 0.01 | 0.9 | 0.4 |
|     | Urban land              | 2236.86  | 2   | 7.12  | 0.00  | 2.78  | 0.07 | 6   | 9   |
|     | Rural residential land  | 2566.35  | 201 | 8.17  | 1.27  | 20.86 | 0.08 |     |     |
|     | Other construction land | 1041.3   | 22  | 3.31  | 2.60  | 8.17  | 0.03 |     |     |
| M10 | Cultivated land         | 18615.33 | 69  | 59.26 | 4.77  | 18.85 | 0.59 |     |     |
|     | Forest                  | 6276.15  | 149 | 19.98 | 1.63  | 21.02 | 0.20 |     |     |
|     | Grassland               | 4.77     | 1   | 0.02  | 0.00  | 1.53  | 0.00 |     |     |
|     | Water area              | 2439     | 12  | 7.76  | 6.06  | 11.37 | 0.08 | 1.2 | 0.5 |
|     | Unused land             | 7.74     | 2   | 0.02  | 0.00  | 1.84  | 0.00 | 2   | 9   |
|     | Urban land              | 2512.8   | 9   | 8.00  | 16.67 | 7.25  | 0.08 |     |     |
|     | Rural residential land  | 859.77   | 112 | 2.74  | 1.54  | 15.81 | 0.03 |     |     |
|     | Other construction land | 699.12   | 28  | 2.23  | 3.97  | 7.75  | 0.02 |     |     |
| M11 | Cultivated land         | 23886.18 | 23  | 76.03 | 10.67 | 15.53 | 0.76 |     |     |
|     | Forest                  | 4359.6   | 181 | 13.88 | 1.60  | 26.23 | 0.14 | 0.8 | 0.4 |
|     | Grassland               | 8.91     | 1   | 0.03  | 0.00  | 1.25  | 0.00 | 0   | 1   |
|     | Water area              | 1945.08  | 21  | 6.19  | 4.76  | 10.28 | 0.06 |     |     |
|     | Unused land             | 7.2      | 1   | 0.02  | 0.00  | 1.78  | 0.00 |     |     |
|     | Urban land              | 0        | 0   | 0.00  | 0.00  | 0.00  | 0.00 |     |     |

|     |                         |          |     |           |       |       |      |     |     |
|-----|-------------------------|----------|-----|-----------|-------|-------|------|-----|-----|
|     | Rural residential land  | 1079.1   | 41  | 3.43      | 2.20  | 8.75  | 0.03 |     |     |
|     | Other construction land | 129.24   | 5   | 0.41      | 0.00  | 3.86  | 0.00 |     |     |
| M12 | Cultivated land         | 23727.42 | 18  | 75.5<br>3 | 13.07 | 13.58 | 0.76 |     |     |
|     | Forest                  | 3488.85  | 165 | 11.1<br>1 | 1.39  | 25.02 | 0.11 |     |     |
|     | Grassland               | 143.91   | 4   | 0.46      | 16.67 | 4.49  | 0.00 |     |     |
|     | Water area              | 1562.85  | 11  | 4.97      | 1.82  | 8.58  | 0.05 | 0.9 | 0.4 |
|     | Unused land             | 0        | 0   | 0.00      | 0.00  | 0.00  | 0.00 | 0   | 6   |
|     | Urban land              | 1586.61  | 6   | 5.05      | 26.67 | 4.77  | 0.05 |     |     |
|     | Rural residential land  | 166.05   | 10  | 0.53      | 4.44  | 5.85  | 0.01 |     |     |
|     | Other construction land | 739.26   | 13  | 2.35      | 1.28  | 6.05  | 0.02 |     |     |

**Table S7.** The physiochemical parameters on sampled water.

| Sample sit | Month |   | BPA   | NP    | EDCs   | pH   | TUB  | DO   | COD <sub>Mn</sub> | NH <sub>3</sub> -N |
|------------|-------|---|-------|-------|--------|------|------|------|-------------------|--------------------|
| T4         | Aug   | 1 | 23.95 | 4.14  | 28.284 | 8.35 | 20.6 | 7.57 | 0.755             | 0.76               |
| T5         | Aug   | 2 | 35.95 | 4.915 | 40.865 | 8.51 | 158  | 7.04 | 0.755             | 0.099              |

| Sample sit | Month |    | BPA        | NP    | EDCs    | pH   | TUB   | DO   | COD <sub>Mn</sub> | NH <sub>3</sub> -N |
|------------|-------|----|------------|-------|---------|------|-------|------|-------------------|--------------------|
| T6         | Aug   | 3  | 9.215      | 3.485 | 12.700  | 8.58 | 24.4  | 7.82 | 3.774             | 0.067              |
| T7         | Aug   | 4  | 11.7       | 5.835 | 17.535  | 8.53 | 43.7  | 7.54 | 3.774             | 0.094              |
| M7         | Aug   | 5  | 43.8       | 6.545 | 50.515  | 8.15 | 41.9  | 5.33 | 3.774             | 0.658              |
| M8         | Aug   | 6  | 50.6       | 4.81  | 55.586  | 8.46 | 34.7  | 7.18 | 2.642             | 0.158              |
| M9         | Aug   | 7  | 41.5       | 4.4   | 65.900  | 8.51 | 18.2  | 7.09 | 3.396             | 0.185              |
| M10        | Aug   | 8  | 17.6       | 4.265 | 21.989  | 8.28 | 19.3  | 7.06 | 0.755             | 0.078              |
| M11        | Aug   | 9  | 16.1       | 6.455 | 22.763  | 8.57 | 95.1  | 8.83 | 1.509             | 0.094              |
| M12        | Aug   | 10 | 18.15      | 5.625 | 23.866  | 8.58 | 96.9  | 9.53 | 3.774             | 0.061              |
| M1         | Aug   | 11 | 15.45      | 5.44  | 21.157  | 8.7  | 18.5  | 7.93 | 2.264             | 0.11               |
| T1         | Aug   | 12 | 61.7       | 7.3   | 71.161  | 7.85 | 20.6  | 7.2  | 4.528             | 0.5235             |
| T2         | Aug   | 13 | 74.6       | 8.025 | 82.812  | 7.94 | 21.87 | 7.36 | 4.906             | 0.3193             |
| T3         | Aug   | 14 | 40.4       | 4.835 | 45.399  | 7.96 | 15.03 | 7.39 | 3.774             | 0.1957             |
| M4         | Aug   | 15 | 9.91       | 3.88  | 13.935  | 8.3  | 22.4  | 8.61 | 0.377             | 0.0345             |
| M5         | Aug   | 16 | 6.93       | 4.41  | 11.955  | 8.22 | 15.57 | 8.53 | 2.264             | 0.056              |
| M2         | Aug   | 17 | 7.705      | 4.035 | 11.955  | 8.35 | 7.96  | 7.91 | 0.377             | 0.0614             |
| M3         | Aug   | 18 | 10.1       | 6.69  | 15.265  | 8.32 | 22.57 | 7.92 | 7.17              | 0.0292             |
| M5         | Sep   | 19 | 14.95      | 2.06  | 17.010  | 8.29 | 14    | 8.95 | 1.96              | 0.08               |
| M2         | Sep   | 20 | 20         | 3.065 | 23.065  | 8.41 | 64    | 8.52 | 4.85              | 0.09               |
| M3         | Sep   | 21 | 15.95      | 3.52  | 26.294  | 8.43 | 61    | 8.72 | 7.74              | 0.86               |
| T4         | Sep   | 22 | 27.15      | 6.755 | 33.905  | 7.98 | 28    | 7.79 | 8.08              | 0.841              |
| T5         | Sep   | 23 | 53         | 2.35  | 55.350  | 8.06 | 19.7  | 7.5  | 7.81              | 0.217              |
| T6         | Sep   | 24 | 18.7       | 2.295 | 20.995  | 8.17 | 16.8  | 7.8  | 5.18              | 0.083              |
| T7         | Sep   | 25 | 17.9       | 3.6   | 21.500  | 8.12 | 18.6  | 7.56 | 5.71              | 0.244              |
| M7         | Sep   | 26 | 38.65      | 6.915 | 45.865  | 7.73 | 13.8  | 5.97 | 8.34              | 0.991              |
| M8         | Sep   | 27 | 54.65      | 4.655 | 59.305  | 8.04 | 15.9  | 7.85 | 8.08              | 0.567              |
| M9         | Sep   | 28 | 56         | 2.965 | 58.965  | 7.91 | 10    | 7.21 | 11.5              | 0.153              |
| M10        | Sep   | 29 | 34.45      | 1.975 | 36.425  | 8.2  | 61    | 8.6  | 5.81              | 0.147              |
| M11        | Sep   | 30 | 25.7       | 2.505 | 28.366  | 8.18 | 37.2  | 8.6  | 10.44             | 0.137              |
| M12        | Sep   | 31 | 22.5       | 2.925 | 25.425  | 8.3  | 200   | 8.36 | 15.71             | 0.099              |
| T4         | Oct   | 32 | 16.6       | 3.48  | 22.718  | 7.5  | 10    | 7.15 | 22.72             | 2.25               |
| T5         | Oct   | 33 | 36.45      | 2.38  | 39.504  | 7.12 | 9.1   | 7.71 | 20.41             | 0.33               |
| T6         | Oct   | 34 | 23.25      | 3.16  | 26.625  | 6.85 | 11.5  | 7.63 | 35.71             | 0.14               |
| T7         | Oct   | 35 | 21         | 3.605 | 25.395  | 7.41 | 6.4   | 7.6  | 23.65             | 0.25               |
| M2         | Oct   | 36 | 5.1        | 3.11  | 8.390   | 6.75 | 9.21  | 8.88 | 20.87             | 0.12               |
| M3         | Oct   | 37 | 6.09       | 2.345 | 11.158  | 8.03 | 9.73  | 7.15 | 22.72             | 0.15               |
| M1         | Oct   | 38 | 13.04      | 2.385 | 15.615  | 8.17 | 88.2  | 8.79 | 18.09             | 0.34               |
| M4         | Oct   | 39 | 11.03<br>5 | 2.18  | 13.258  | 8.22 | 10.8  | 8.89 | 20.41             | 0.046              |
| M5         | Oct   | 40 | 5.635      | 2.495 | 10.196  | 8    | 13.5  | 8.79 | 19.48             | 0.171              |
| M6         | Oct   | 41 | 8.61       | 2.685 | 11.471  | 8.06 | 15.8  | 9.14 | 19.48             | 0.082              |
| T1         | Oct   | 42 | 203.5      | 11.8  | 215.300 | 7.56 | 7.6   | 7.81 | 0.94              | 2.206              |
| T2         | Oct   | 43 | 92.2       | 9.565 | 102.088 | 7.27 | 7.61  | 7.76 | 0.63              | 1.509              |

| Sample sit | Month |    | BPA   | NP    | EDCs    | pH   | TUB  | DO   | COD <sub>Mn</sub> | NH <sub>3</sub> -N |
|------------|-------|----|-------|-------|---------|------|------|------|-------------------|--------------------|
| T3         | Oct   | 44 | 101.5 | 8.93  | 111.564 | 7.78 | 9.22 | 8.55 | 0.63              | 0.872              |
| M7         | Oct   | 45 | 42.7  | 9.785 | 58.345  | 7.91 | 59.3 | 8.07 | 2.51              | 0.937              |
| M8         | Oct   | 46 | 39.7  | 3.27  | 43.227  | 8.02 | 9.97 | 9.45 | 2.82              | 0.272              |
| M9         | Oct   | 47 | 35.6  | 4.635 | 40.418  | 7.53 | 17.3 | 8.56 | 1.88              | 0.248              |
| M10        | Oct   | 48 | 24.7  | 2.07  | 28.242  | 8.03 | 23.6 | 8.97 | 1.25              | 0.2                |
| M11        | Oct   | 49 | 22.15 | 2.595 | 24.872  | 7.85 | 19.2 | 8.72 | 2.82              | 0.27               |

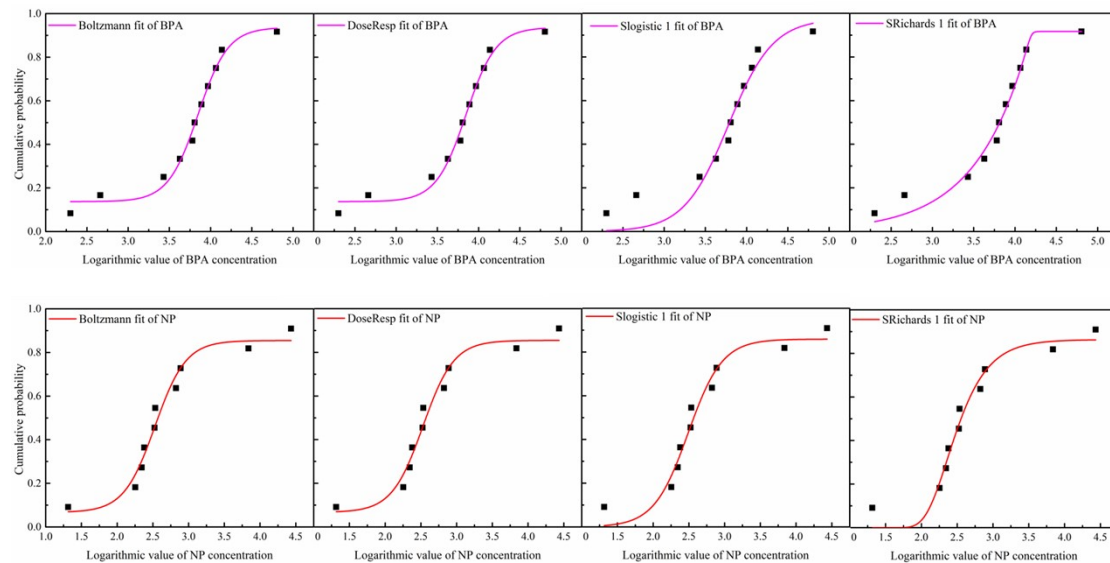

**Fig. S3.** Comparison of different models fitting for acute toxicity data of BPA and NP.
